# Supplementary material for: Estuarine hurricane wind can intensify surge-dominated extreme water level in shallow and converging coastal systems
Source: Copernicus journal article supplement (doi:10.5194/egusphere-2023-2134), 2023-10-17
Supplement: Supplementary file [file egusphere-2023-2134-AC1-supplement.pdf]

We are grateful to the reviewer for the constructive comments that helped improve the manuscript. In the following, we state the referee's comments (in blue) followed by the response and actions taken (in black). We have also highlighted the changes in the revised manuscript, where new texts are represented using blue and deleted texts using red. The line numbers given here are also from the edited version.

## 1 Referee 1

### Comment #1

Lines 038–053: While some earlier research has been provided in the INTRODUCTION section, the authors are encouraged to review and include two additional relevant publications that particularly addressed related research themes and Atlantic Ocean tropical cyclones. First, Parker et al. (2023; <https://doi.org/10.1007/s11069-023-05939-6>) used the GTSM-ERA5 model to investigate the proportional impacts of storm surge, wave setup, and astronomic tides on extreme water levels along the U.S. Southeast Coast. Their study revealed distinctive regional trends in the average contributions of storm surge and waves to extreme water levels during a 38-year period. Extreme water levels in the region result from combined surge, tide, and wave effects. The significance of each component varies across different locations. Next, Hsu et al. (2023; <https://doi.org/10.5194/nhess-23-3895-2023>) used the COAWST model to analyze how the storm characteristics of three historical hurricanes affected the storm surges and wave runup along the South Atlantic Bight. It was revealed that as lower storm translation speed prolongs total water level exceedance, potentially causing greater economic losses. Wave setup and swash predominantly impacted peak total water level, with pre-storm wave runup sometimes surpassing peak storm total water level under specific conditions.

### Response to comment #1

We want to thank the reviewer for providing these useful references. We have included them in our introduction to clarify more about the sensitivity of extreme water levels to hurricane characteristics and the interaction of storm surge, wave setup, and astronomic tides. We also added Suh and Lee (2018) here based on the suggestion in comment #9.

On page 2, lines 41-48: *More specifically, an inaccurate representation of any of these hurricane characteristics: intensity, size, translation speed, and the angle of landfall with the coast can introduce large biases in predicting the surge and coastal flooding (Suh and Lee, 2018). In a recent study, Hsu et al. (2023) examined the role of these variables for three different hurricanes that propagated through the South Atlantic Bight [Matthew (2016), Dorian (2019), and Isaias (2020)] and showed how they affect the peak storm surge and wave runup in the South Atlantic coastline. For the same region, Parker et al. (2023) demonstrated that various combinations of tide, non-tidal residual, and wave setup and their spatially varying interaction can control the total water level at different U.S. Southeast Atlantic coastline regions.*

### Comment #2

Lines 102–104: It would be great if the authors could explain how the total number of parameter sets (i.e., 50) was determined. Is it, for instance, based on any earlier research? Or did the authors carry out a sensitivity study?

## Response to comment #2

We've added text to Appendix A to clarify our ensemble setup, which we'll paraphrase here: Following the methods of Reed et al. (2020; <https://doi.org/10.1126/sciadv.aaw9253>), we test the sensitivity of hurricane fidelity to model initialization time. This is accomplished by conducting "mini" 10-member ensembles, each initialized at 12-hour increments from just before Irene's first U.S. landfall in North Carolina back to 5 days previous. We analyze the (mini) ensemble mean hurricane track and intensity errors at each initialization time to identify an optimal initialization time that attempts to maximize both simulation fidelity and forecast lead time (to allow sufficient hurricane spin-up). As 10-member ensembles yield an inadequately small sample size, we expand the mini ensemble initialized at the optimal time (26 August 2011 00Z), as well as the ensemble initialized 12 hours earlier (25 August 2011 12Z), to 50 members each. This is very similar to the approach used in Reed et al. (2020), in which a 100-member ensemble was run at a single optimal initialization time. We felt that using a second initialization time might provide a greater diversity of model solutions – though admittedly the large inland track bias in the earlier initialization (E2) was unexpected.

## Comment #3

Figure 2(d): The authors are encouraged to indicate the direction reference. In other words, does a vector pointing toward the top in the lower part of the figure indicate southward wind? Also, is the length of the vectors proportional to the wind speed?

## Response to comment #3

We have added the directional reference to Figure 2(d). In this plot, the red and blue wind vectors represent the southerly and northerly wind, respectively, and they are scaled using the wind speed. We also edited the Figure 2(d) caption to explain it better.

## Comment #4

Lines 104–107: Does this mean that the initial locations of the track/storm eye of ensemble E1 is the re-analyzed storm eye location on August 26, 2011 00:00, and the initial locations of the track/storm eye of ensemble E2 is the re-analyzed storm eye location on August 25, 2011 12:00? If yes, the authors might want to indicate it and provide more information here.

## Response to comment #4

The reviewer is correct – the storm centers are slightly different in E1 vs. E2 because the ERA5-based meteorological patterns are slightly different between the two initialization times. We have added the following sentence to clarify this:

On page 6, lines 112-114: "Both the ERA5-based meteorological patterns and the diagnosed storm center at these two initialization times are slightly different from each other and ultimately result in a more diverse spread of simulated Irene tracks."

## Comment #5

Lines 157–159: The authors are encouraged to make the format of date/time consistent throughout the manuscript. In lines 105, the authors used 26 August 2011 00Z and 25 August 2011 12:00Z, which were already different from each other. These date/time formats in lines

105 are also different from the format in lines 157–159. The authors are also encouraged to make the date/time formats on figure axes consistent throughout the manuscript (e.g., Figures A1, A2, and B1).

## Response to comment #5

We have modified all the date/time formats within the main text and on figure axes to make them consistent.

## Comment #6

Lines 164–166: The authors are encouraged to provide more details about why Cases A and B were selected specifically from ensembles E1 and E2. For instance, do they have the highest peak surges or largest wind speed at specific locations compared to other cases in the two ensembles? In addition, the authors are encouraged to quantitatively demonstrate how similar are the surges produced by Cases A and B. For example, does this statement imply that the difference in peak surge elevations is less than a particular amount during a specific period? Or does this imply that the root-mean-square difference (or any other indicators) between the two time series is smaller than any given number?

## Response to comment #6

We previously did not discuss the selection process of Cases A and B in detail in the main text. To address this concern, we now include a supplemental material section “Hurricane case selection: Case A from Ensemble E1 and Case B from E2” that shows the step-by-step approach we took before selecting these two tracks. We added the following paragraph in that supplemental material section.

*One of the main objectives of this study is to demonstrate how estuarine wind fields can exacerbate hurricane-driven coastal and riverine flooding. To illustrate this, we chose two cases from the different ensembles of hurricanes E1 and E2 that can provide a more straightforward explanation of the variation in along-channel peak water surface elevation (WSE) from the interaction of surface wind stress inside the estuary, tide, and geometry, shown in Figure 2c. In Figure 2c, between SJS and RP (close to 80 km from the bay entrance), we can notice a higher peak WSE for E1. This location is near the open bay, far from the influence of river discharge, and the remote- and estuarine-wind-generated surges primarily dominate the flooding. Because of the largest bay WSE there (in Figure 2c), we compared the time series of WSE between all members of E1 (shown in Figure S1) and observed that member/case 35 produced the highest WSE. Hence, we picked this event from E1 and called “Case A” (which has a primarily northerly wind) to further assess the role of the estuarine local wind. Compared to E1, E2 has more inland tracks (primarily southerly wind) and generates a much higher range of surges, especially in the mid-bay. To explain the role of the estuarine local wind in E2 surges, we tried to rank the members that have negligible influence from river discharge on WSE, have a similar magnitude of wind speed, time scale (translation through the bay), and WSE at the bay entrance compared to Case A from E1. Identifying such an event from E2 can easily demonstrate the role of the southerly estuarine wind in surge amplification. Figure S2 compares Delaware River discharge at the model flow boundary where we identified four members, 42, 22, 8, and 14, that produced the lowest fluvial discharge. Subsequently, we also examined the wind speed and direction from these E2 members with Case A from E1 (shown in Figure S3; the red and blue wind vectors represent the southerly and northerly wind, respectively, and they are scaled*

using the wind speed) and observed that E2 Case 14 generated a relatively similar wind speed and time scale than others. Before choosing Case 14 from E2 for further analysis, we also compared the WSE at the bay entrance. While we did not compare the root-mean-square of the four members from E2 with Case A because of the phase lag between E1 and E2 members, from Figure S4, we can see that Case 14 has the closest peak WSE to Case A among them and the difference is around 0.27 m. Ultimately, based on all these different comparisons, we picked E2 Case 14 as “Case B” to demonstrate the role of estuarine southerly wind direction in elevating the surge-induced flooding in Delaware Bay and River compared to northerly wind direction or “Case A”.

On page 10, line 176 of the main article:

*We provided a more thorough description of different process comparisons that led to these event selections in the supplemental material titled “Hurricane case selection”.*

## **Comment #7**

Lines 170–172: Does this mean that, regardless of the storm eye’s instantaneous location, all computational grids within the polygon must have zero wind speeds? Furthermore, it is recommended that the authors explain the process by which this polygon was created and established. For instance, will the results change significantly if the shape of this polygon changes?

## **Response to comment #7**

Section 4 now provides more details on this force modification.

On page 10, line 184: *We used this bounding polygon to select the E3SM grid cells that fully cover the FVCOM model domain. FVCOM uses a bilinear interpolation method to assign wind velocity at the unstructured grid cells from the meteorological dataset. To represent a scenario with nominal estuarine wind during hurricane landfall, we multiplied the E3SM wind velocity vectors (in m/s) within the polygon with 0.1 to uniformly dampen the wind magnitude in the selected cells, regardless of the instantaneous location of the hurricane. For the two cases, A and B, this artificial dampening reduced the peak wind speed magnitude to  $\sim 2.0$  m/s, making the impact of the hurricane wind field negligible. In addition, the polygon and E3SM grid cells extensively covered the FVCOM model domain, going beyond the FVCOM boundary, to better interpolate the wind forcing.*

On page 11, line 214: *As described earlier, we multiplied the E3SM wind velocity vectors (in m/s) by 0.1 outside/within the polygon (shown in Figures 3a,b) to make estuarine/remote wind stress-only cases, respectively.*

Furthermore, we would like to state that the results will not change based on the shape as long as it contains all the E3SM cells that overlap the FVCOM unstructured grid cells representing the bay and the river (wet cells).

## **Comment #8**

Lines 197–199: While it is understood that the gradients of the curves look ‘similar’ by eye, the authors are encouraged to quantitatively describe how similar are the along-channel peak WSE gradients. For example, root-mean-square difference or model skill might be good indicators.

## Response to comment #8

We added the following lines to the main text to clarify the difference between the along-channel peak WSE for the two cases.

On page 11, line 219: *When the full wind field is included, we can see a similar along-channel peak WSE gradient where the difference in peak water level, varying from 0.73 to 1.05 m, came from the remote surge propagation through Delaware Bay.*

## Comment #9

Lines 223–260: The authors are encouraged to include some more relevant studies in the discussion section. In addition to the works of Parker et al. (2023) and Hsu et al. (2023) mentioned above, Suh and Lee (2018; <https://doi.org/10.1016/j.csr.2018.09.007>) analyzed the effects of storm translation speed and storm path on surge propagation processes and surge level along the coast. The authors might also want to consider including Suh and Lee (2018) in the INTRODUCTION. Incorporating discussions on these relevant works in the DISCUSSION AND CONCLUSIONS section is thought to be advantageous for readers, offering a more comprehensive background.

## Response to comment #9

We have included the necessary references in the discussion section to briefly explain what was lacking in the previous studies, how we addressed the interaction between estuarine wind and surge using a physics-based integrated framework, and the future tasks that need to be done.

On page 15, line 250: *Previous works related to the sensitivity of storm surge and coastal flooding to hurricane landfall locations, wind field (speed and direction), and geometry [e.g., Powell and Houston (1996); Houston et al. (1999); Shen et al. (2006b); Weisberg and Zheng (2008); Marsooli and Lin (2018)] have not separately examined the role of this shorter period (translation period through the estuary) and estuarine-scale landfalling wind using physics-based integrated modeling frameworks.*

On page 15, line 256: *Further work is also needed to examine the role of hurricane intensity, the radius of maximum wind, translation speed, and the interaction between tide, non-tidal residual, and waves, separately, all of which could similarly influence the coastal flood level (Suh and Lee, 2018; Parker et al., 2023; Hsu et al., 2023).*
